# Supplementary material
Source: publisher figshare collection journal article supplement (https://wiley.figshare.com/articles/dataset/_/3564195)
Supplement: Supplementary file 1 [file 1]

## APPENDIX D. Pairwise effective migration rate matrices.

TABLE D1. Pairwise effective migration rate estimates ( $N_e m$ ) for each watershed pair based on maximum-likelihood MCMC simulations. Matrices are segregated by direction, with the first column representing the source of migrants and the first row representing the recipient population. The 95% confidence interval is reported in parentheses for each migration rate estimate.

| <b>Watershed Pair</b> | <b>Reach</b>    | <b>Bynum 1</b>  | <b>Bynum 2</b>  | <b>Winter 1</b> | <b>Winter 2</b> |               |       |
|-----------------------|-----------------|-----------------|-----------------|-----------------|-----------------|---------------|-------|
| <b>A</b>              | <b>Bynum 1</b>  | -               | 0.192           | 0.312           | 0.105           |               |       |
|                       |                 |                 | (0.163-0.242)   | (0.271-0.369)   | (0.091-0.125)   |               |       |
|                       |                 | <b>Bynum 2</b>  | 0.426           | -               | 0.257           | 0.140         |       |
|                       |                 |                 | (0.346-0.539)   | (0.225-0.296)   | (0.123-0.171)   |               |       |
|                       | <b>Winter 1</b> | 0.512           | 0.286           | -               | 0.152           |               |       |
|                       |                 | (0.413-0.653)   | (0.243-0.332)   |                 | (0.132-0.182)   |               |       |
|                       | <b>Winter 2</b> | 0.253           | 0.206           | 0.105           | -               |               |       |
|                       |                 | (0.210-0.325)   | (0.178-0.242)   | (0.090-0.122)   |                 |               |       |
|                       | <b>B</b>        | <b>Little 1</b> | -               | 0.269           | 0.252           | 0.365         |       |
|                       |                 |                 |                 | (0.232-0.317)   | (0.220-0.292)   | (0.306-0.442) |       |
|                       |                 |                 | <b>Little 2</b> | 0.416           | -               | 0.273         | 0.269 |
|                       |                 |                 |                 | (0.353-0.481)   | (0.236-0.318)   | (0.221-0.322) |       |
| <b>Gun 1</b>          |                 | 0.340           | 0.256           | -               | 0.350           |               |       |
|                       |                 | (0.290-0.397)   | (0.221-0.294)   |                 | (0.288-0.427)   |               |       |
| <b>Gun 2</b>          |                 | 0.303           | 0.195           | 0.457           | -               |               |       |
|                       |                 | (0.265-0.352)   | (0.168-0.224)   | (0.395-0.534)   |                 |               |       |
| <b>C</b>              |                 | <b>Jones 1</b>  | -               | 0.195           | 0.273           | 0.463         |       |
|                       |                 |                 |                 |                 |                 |               |       |
|                       |                 |                 | <b>Jones 2</b>  |                 |                 |               |       |
|                       |                 |                 | <b>Gwynn 1</b>  |                 |                 |               |       |
|                       | <b>Gwynn 2</b>  |                 |                 |                 |                 |               |       |

|          |                 |                 |                 |                 |
|----------|-----------------|-----------------|-----------------|-----------------|
|          |                 | (0.172-0.313)   | (0.240-0.313)   | (0.409-0.527)   |
|          | <b>Jones 2</b>  | 0.323           | -               | 0.219           |
|          |                 | (0.283-0.374)   |                 | (0.192-0.252)   |
|          | <b>Gwynn 1</b>  | 0.415           | 0.216           | -               |
|          |                 | (0.364-0.481)   | (0.188-0.249)   |                 |
|          | <b>Gwynn 2</b>  | 0.355           | 0.335           | 0.461           |
|          |                 | (0.311-0.409)   | (0.293-0.385)   | (0.405-0.533)   |
|          |                 | <b>Patuxt 1</b> | <b>Patuxt 2</b> | <b>Seneca 1</b> |
|          |                 | <b>Seneca 2</b> |                 |                 |
| <b>D</b> | <b>Patuxt 1</b> | -               | 0.328           | 0.152           |
|          |                 |                 | (0.286-0.377)   | (0.132-0.179)   |
|          | <b>Patuxt 2</b> | 0.167           | -               | 0.339           |
|          |                 | (0.146-0.201)   |                 | (0.293-0.387)   |
|          | <b>Seneca 1</b> | 0.120           | 0.351           | -               |
|          |                 | (0.104-0.161)   | (0.307-0.401)   |                 |
|          | <b>Seneca 2</b> | 0.129           | 0.247           | 0.219           |
|          |                 | (0.109-0.154)   | (0.214-0.286)   | (0.184-0.252)   |

---
